# Supplementary material for: Correlation between the Expression of Angiogenic Factors and Stem Cell Markers in Human Uveal Melanoma
Source: MDPI journal article supplement (doi:10.3390/life10120310), 2020-11-25
Supplement: s1 [file s1]

Supplementary Materials

# Correlation between the Expression of Angiogenic Factors and Stem Cell Markers in Human Uveal Melanoma

**Table S1.** Spearman statistical analysis showed no significant association between pathological markers, such as sclera and nervus opticus infiltration and the expression of genes investigated in this study.

|                             |                         | FZD6  | HIF1 $\alpha$ | VEGFA | Melanin |
|-----------------------------|-------------------------|-------|---------------|-------|---------|
| Sclera infiltration         | Correlation coefficient | -,200 | 319*          | ,035  | -,020   |
|                             | Sig. (2-tailed)         | ,198  | ,042          | ,830  | ,902    |
|                             | N                       | 43    | 41            | 39    | 41      |
| Nervus opticus infiltration | Correlation coefficient | -,192 | ,139          | -,007 | -,126   |
|                             | Sig. (2-tailed)         | ,192  | ,358          | ,962  | ,406    |
|                             | N                       | 48    | 46            | 44    | 46      |

\*Correlation is significant at the 0.05 level (2-tailed probe).

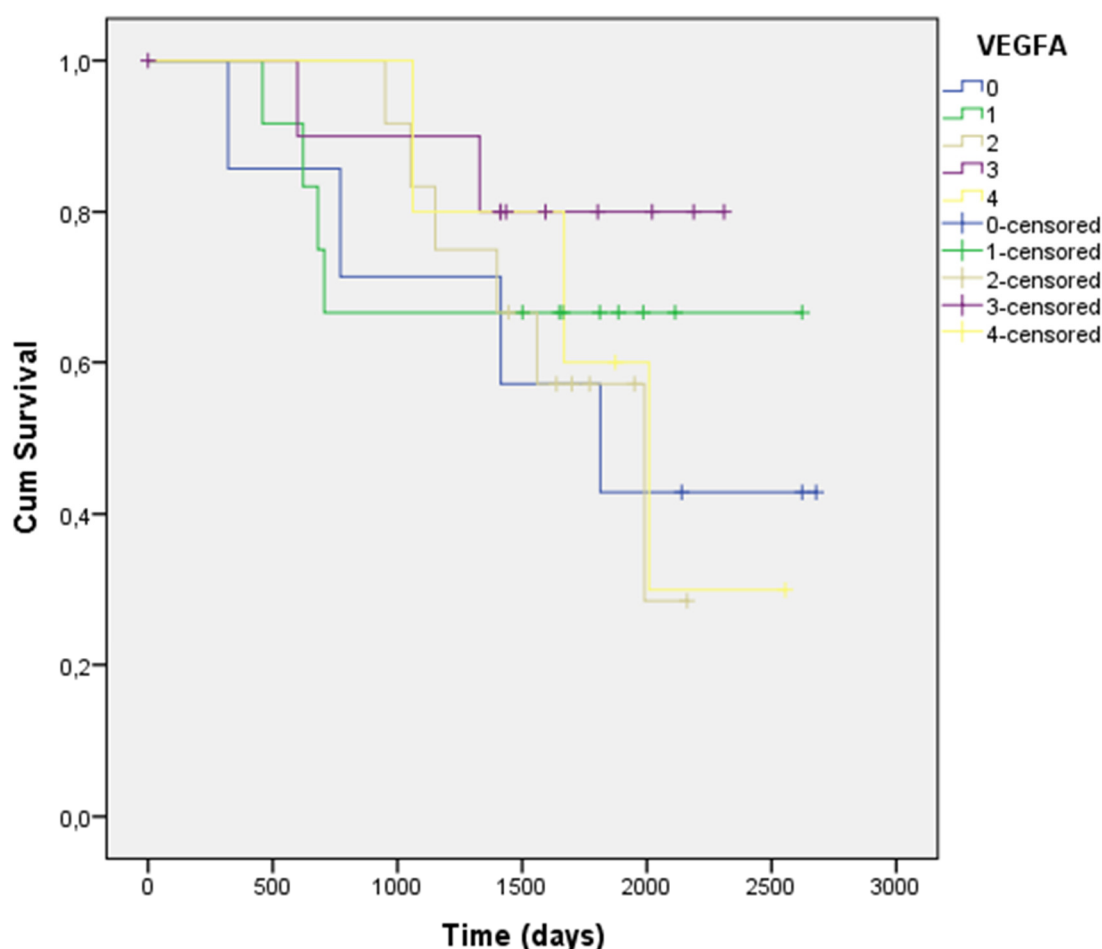

**Figure S1.** Kaplan–Meier curves showed no significant correlation between the VEGFA expression and the survival rate (Mantel–Cox test,  $n = 47$ ,  $p = 0.757$ ).

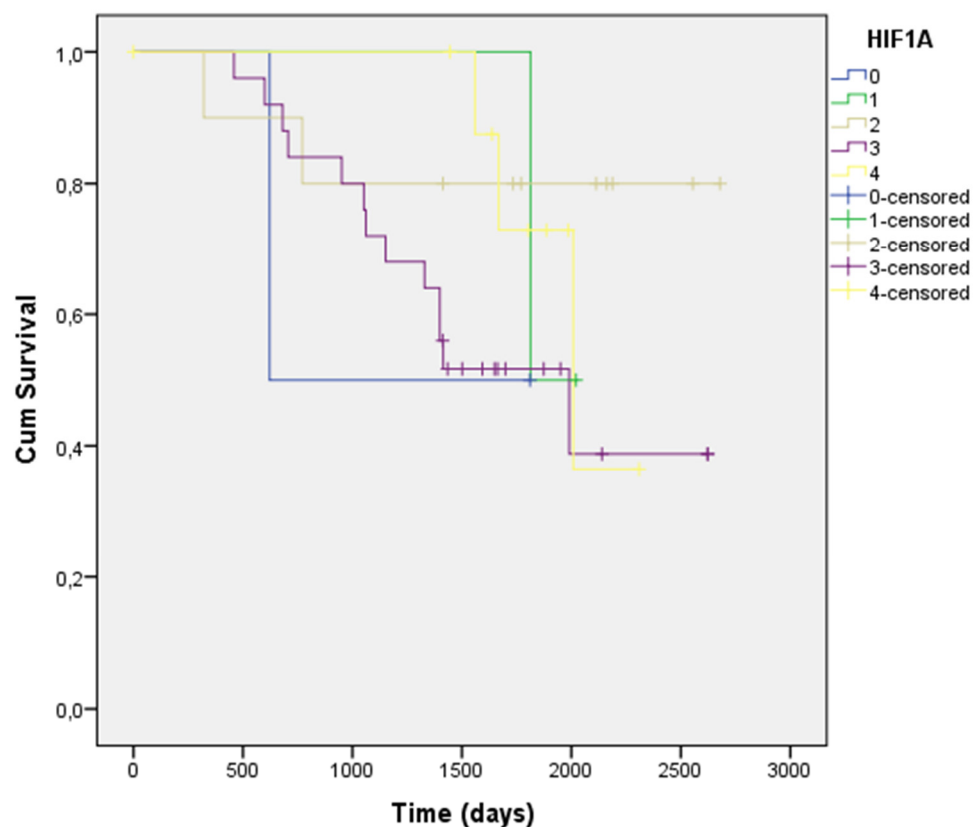

**Figure S2.** No correlation was found between the HIF-1 $\alpha$  expression and the survival of the patients with UM (Mantel–Cox test,  $n = 49$ ,  $p = 0.336$ ).

**Publisher’s Note:** MDPI stays neutral with regard to jurisdictional claims in published maps and institutional affiliations.

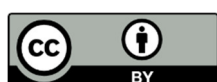

© 2020 by the authors. Licensee MDPI, Basel, Switzerland. This article is an open access article distributed under the terms and conditions of the Creative Commons Attribution (CC BY) license (<http://creativecommons.org/licenses/by/4.0/>).
